# Supplementary material for: Sustainable Working Life in a Swedish Twin Cohort—A Definition Paper with Sample Overview
Source: MDPI journal article supplement (doi:10.3390/ijerph18115817), 2021-05-28
Supplement: s1 [file s1]

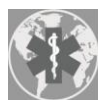

## Supplemental material

**Table S1.** The full sample, prevalences of those without unemployment, sickness absence or disability pension pre a year from 1994 to 2016.

| year | No unemployment |           |    | No sickness absence |           |    | No disability pension |           |    |
|------|-----------------|-----------|----|---------------------|-----------|----|-----------------------|-----------|----|
|      | Full sample     | Frequency | %  | Full sample         | Frequency | %  | Full sample           | Frequency | %  |
| 1994 | 81488           | 65910     | 81 | 81682               | 71683     | 88 | 81682                 | 74884     | 92 |
| 1995 | 81344           | 66516     | 82 | 81555               | 72219     | 89 | 81555                 | 74765     | 92 |
| 1996 | 81293           | 66705     | 82 | 81511               | 73263     | 90 | 81511                 | 74751     | 92 |
| 1997 | 81357           | 67150     | 83 | 81565               | 75331     | 92 | 81565                 | 74736     | 92 |
| 1998 | 81337           | 68779     | 85 | 81519               | 73269     | 90 | 81519                 | 74722     | 92 |
| 1999 | 81342           | 69751     | 86 | 81533               | 71846     | 88 | 81533                 | 74673     | 92 |
| 2000 | 81375           | 71255     | 88 | 81560               | 70823     | 87 | 81560                 | 74554     | 91 |
| 2001 | 81388           | 72616     | 89 | 81575               | 70181     | 86 | 81575                 | 74263     | 91 |
| 2002 | 81654           | 73054     | 89 | 81877               | 70006     | 86 | 81877                 | 74083     | 90 |
| 2003 | 81854           | 72664     | 89 | 82070               | 71535     | 87 | 82070                 | 74003     | 90 |
| 2004 | 81702           | 71873     | 88 | 81927               | 72613     | 89 | 81927                 | 73550     | 90 |
| 2005 | 81688           | 71849     | 88 | 81871               | 72551     | 89 | 81871                 | 73294     | 90 |
| 2006 | 81861           | 72546     | 89 | 82057               | 73351     | 89 | 82057                 | 73533     | 90 |
| 2007 | 82049           | 74745     | 91 | 82244               | 74204     | 90 | 82244                 | 73825     | 90 |
| 2008 | 82149           | 75688     | 92 | 82340               | 75207     | 91 | 82340                 | 74244     | 90 |
| 2009 | 79735           | 71090     | 89 | 79907               | 73579     | 92 | 79907                 | 72303     | 90 |
| 2010 | 77329           | 69508     | 90 | 77496               | 71386     | 92 | 77496                 | 70616     | 91 |
| 2011 | 74957           | 68739     | 92 | 75116               | 68915     | 92 | 75116                 | 69031     | 92 |
| 2012 | 72650           | 66914     | 92 | 72819               | 66264     | 91 | 72819                 | 67304     | 92 |
| 2013 | 70457           | 65028     | 92 | 70599               | 63878     | 90 | 70599                 | 65439     | 93 |
| 2014 | 68157           | 63380     | 93 | 68290               | 61166     | 90 | 68290                 | 63413     | 93 |
| 2015 | 66103           | 62046     | 94 | 66238               | 58774     | 89 | 66238                 | 61578     | 93 |
| 2016 | 64046           | 60479     | 94 | 64189               | 56657     | 88 | 64189                 | 59813     | 93 |

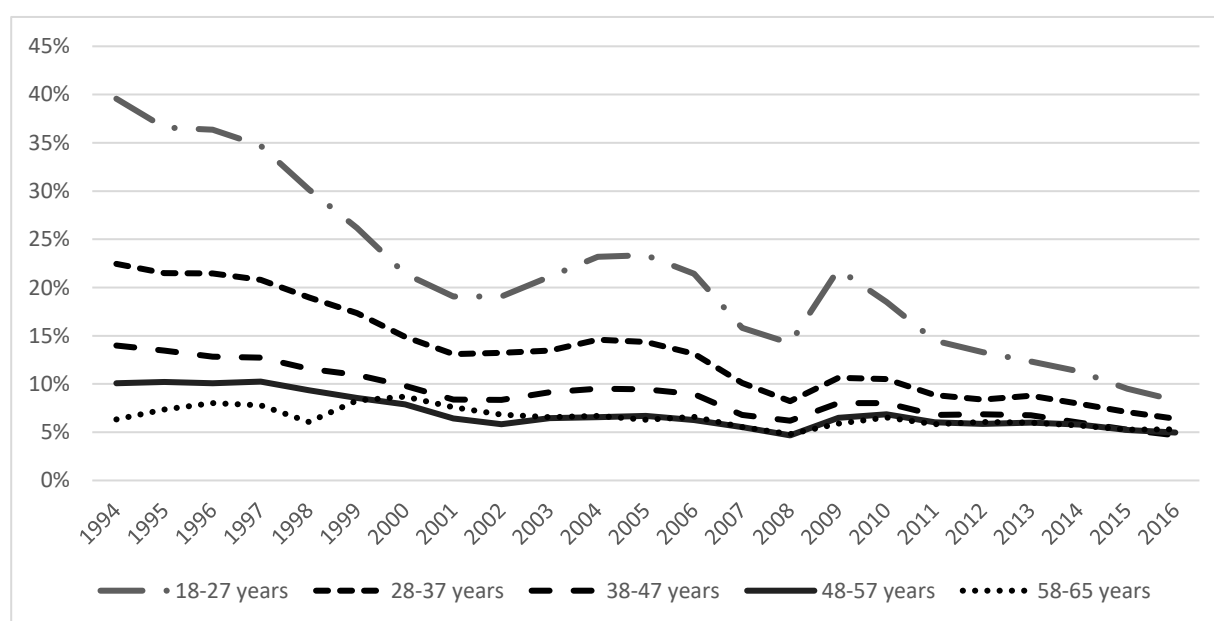

**Figure S1.** Prevalence of unemployment across age categories.

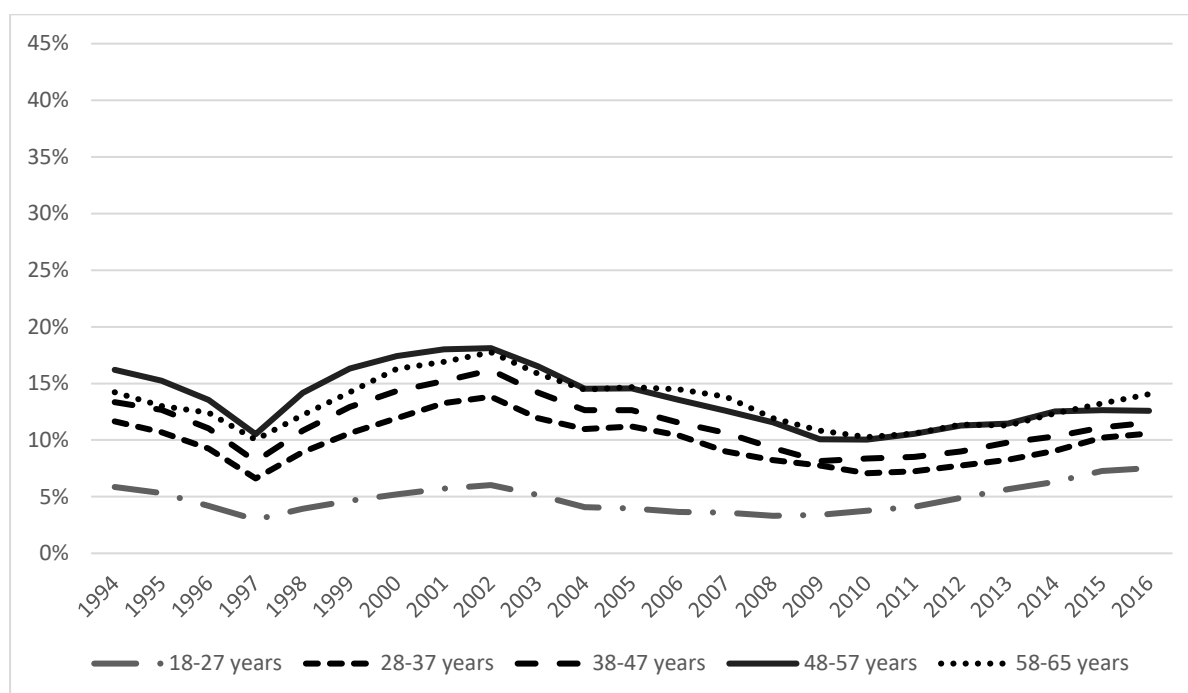

**Figure S2.** Prevalence of sickness absence across age categories.

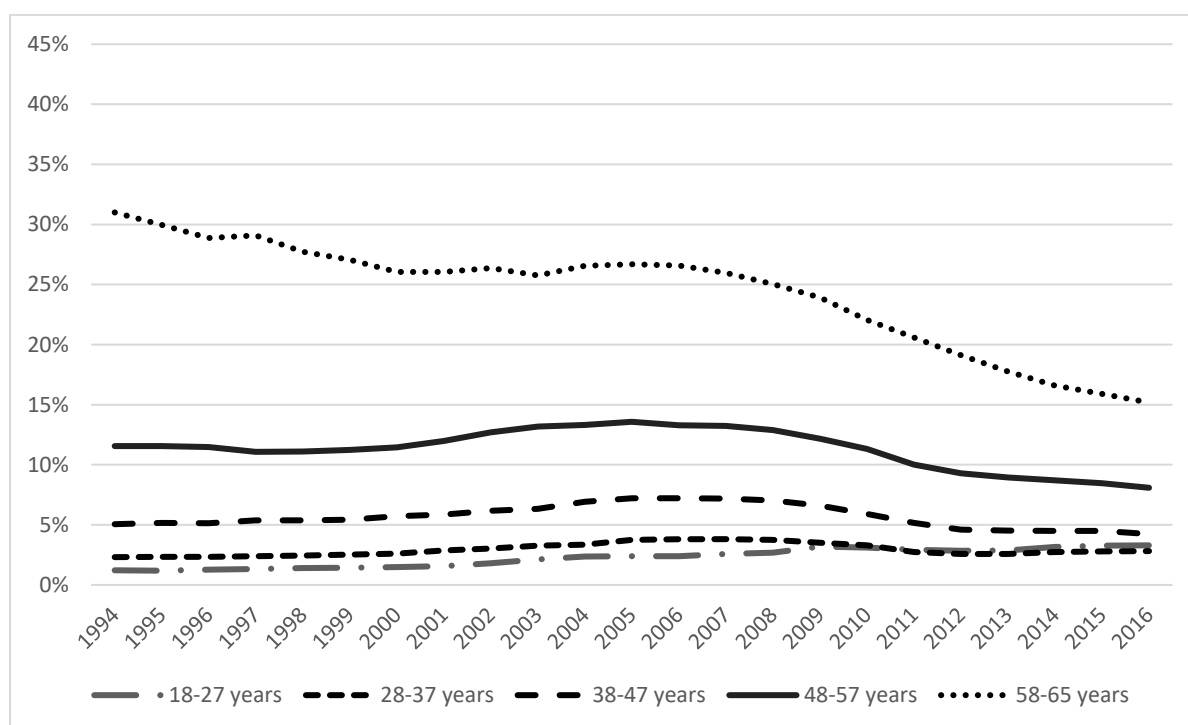

**Figure S3.** Prevalence of disability pension across age categories.
